# Supplementary material for: QKI degradation in macrophage by RNF6 protects mice from MRSA infection via enhancing PI3K p110β dependent autophagy
Source: PubMed Central journal article supplement (PMC9464412; doi:10.1186/s13578-022-00865-9), 2022-09-10
Supplement: 13578_2022_865_MOESM3_ESM.pdf [file 13578_2022_865_MOESM3_ESM.pdf]

**Table S1 related to Fig.1. Analysis of clinical and microbiological characteristics of patients with septic shock**

| Pt# | SEX | AGE | SEPSIS SOURCE                  | Identified Pathogen             | PCT  |
|-----|-----|-----|--------------------------------|---------------------------------|------|
| 1   | F   | 49  | Intra-abdominal                | <i>Staphylococcus aureus</i>    | 13.2 |
| 2   | F   | 64  | Intra-abdominal                | <i>Staphylococcus aureus</i>    | 16.3 |
| 3   | M   | 36  | Intra-abdominal                |                                 | 3.3  |
| 4   | F   | 51  | Skin and Soft Tissue Infection |                                 | 2.5  |
| 5   | F   | 46  | Intra-abdominal                |                                 | 17.0 |
| 6   | M   | 66  | Urinary tract infection        | <i>Staphylococcus aureus</i>    | 6.8  |
| 7   | M   | 72  | Intra-abdominal                |                                 | 5.0  |
| 8   | F   | 44  | Intra-abdominal                | <i>Staphylococcus aureus</i>    | 19.2 |
| 9   | F   | 38  | Intra-abdominal                | <i>Escherichia coli</i>         | 14.9 |
| 10  | M   | 62  | Intra-abdominal                | <i>Streptococcus pyogenes</i>   | 1.9  |
| 11  | M   | 46  | Urinary tract infection        |                                 | 3.6  |
| 12  | M   | 71  | Intra-abdominal                |                                 | 9.3  |
| 13  | M   | 84  | Pneumonia                      | <i>Streptococcus pneumoniae</i> | 11.6 |
| 14  | F   | 77  | Intra-abdominal                |                                 | 4.2  |
| 15  | F   | 52  | Intra-abdominal                |                                 | 5.1  |
| 16  | M   | 47  | Intra-abdominal                |                                 | 6.6  |
| 17  | M   | 60  | Pneumonia                      | <i>Pseudomonas aeruginosa</i>   | 4.9  |
| 18  | M   | 51  | Intra-abdominal                |                                 | 2.6  |

---

| Pt# | SEX | AGE | SEPSIS SOURCE                  | Identified Pathogen             | PCT  |
|-----|-----|-----|--------------------------------|---------------------------------|------|
| 19  | F   | 56  | Skin and Soft Tissue Infection | <i>Escherichia coli</i>         | 3.0  |
| 20  | F   | 62  | Intra-abdominal                | <i>Staphylococcus aureus</i>    | 21.3 |
| 21  | M   | 27  | Intra-abdominal                |                                 | 19.2 |
| 22  | F   | 42  | Skin and Soft Tissue Infection |                                 | 5.6  |
| 23  | F   | 66  | Intra-abdominal                |                                 | 7.3  |
| 24  | M   | 66  | Intra-abdominal                | <i>Staphylococcus aureus</i>    | 6.8  |
| 25  | M   | 49  | Intra-abdominal                |                                 | 5.0  |
| 26  | F   | 64  | Intra-abdominal                | <i>Staphylococcus aureus</i>    | 19.2 |
| 27  | F   | 67  | Pneumonia                      | <i>Escherichia coli</i>         | 14.9 |
| 28  | M   | 61  | Intra-abdominal                |                                 | 1.9  |
| 29  | M   | 51  | Intra-abdominal                | <i>Staphylococcus aureus</i>    | 6.9  |
| 30  | M   | 70  | Intra-abdominal                | <i>Streptococcus pyogenes</i>   | 11.9 |
| 31  | M   | 80  | Pneumonia                      | <i>Streptococcus pneumoniae</i> | 13.2 |
| 34  | M   | 33  | Intra-abdominal                |                                 | 8.4  |
| 36  | M   | 94  | Intra-abdominal                |                                 | 11.2 |

---
